# Supplementary material for: Novel spiro[fluorene-9,9′-xanthene]-based hole transport layers for red and green PHOLED devices with high efficiency and low efficiency roll-off
Source: Royal Society of Chemistry journal article supplement (doi:10.1039/d0tc04676k), 2021-01-01
Supplement: d0tc04676k1.pdf [file d0tc04676k1.pdf]

## Supporting Information

# Novel spiro[fluorene-9,9'-xanthene]-based hole transport layers for red and green PHOLED devices with high efficiency and low efficiency roll-off

*Tao Wang,<sup>a</sup> Ming Shi,<sup>‡a</sup> Daqi Fang<sup>‡a</sup>, Junpeng He,<sup>a</sup> Meng Zhang,<sup>b</sup> Siwei Zhang,<sup>b</sup> Hong Meng<sup>\*a</sup>,  
Guodan Wei<sup>\*b</sup>*

<sup>a</sup> School of Advanced Materials, Peking University Shenzhen Graduate School, Peking University, Shenzhen, 518055, PR China;

<sup>b</sup> Tsinghua-Berkeley Shenzhen Institute (TBSI), Tsinghua Shenzhen International Graduate School, Tsinghua University, Shenzhen, 518055, PR China;

\*E-mail: [menghong@pku.edu.cn](mailto:menghong@pku.edu.cn)

‡These authors contributed equally.

KEYWORDS Spiro[fluorene-9,9'-xanthene], Hole-transporting materials, Pure red PHOLEDs, High efficiency

## Figures

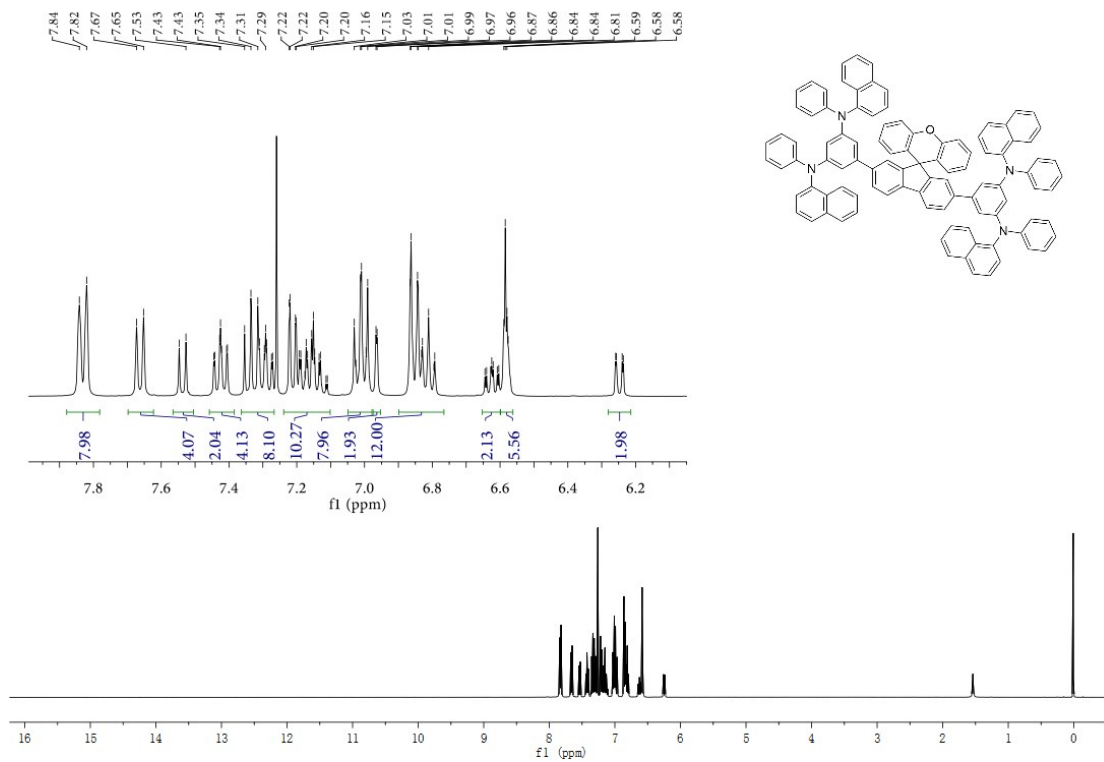

**Fig S1.** <sup>1</sup>H-NMR spectra of DPNA-SFX.

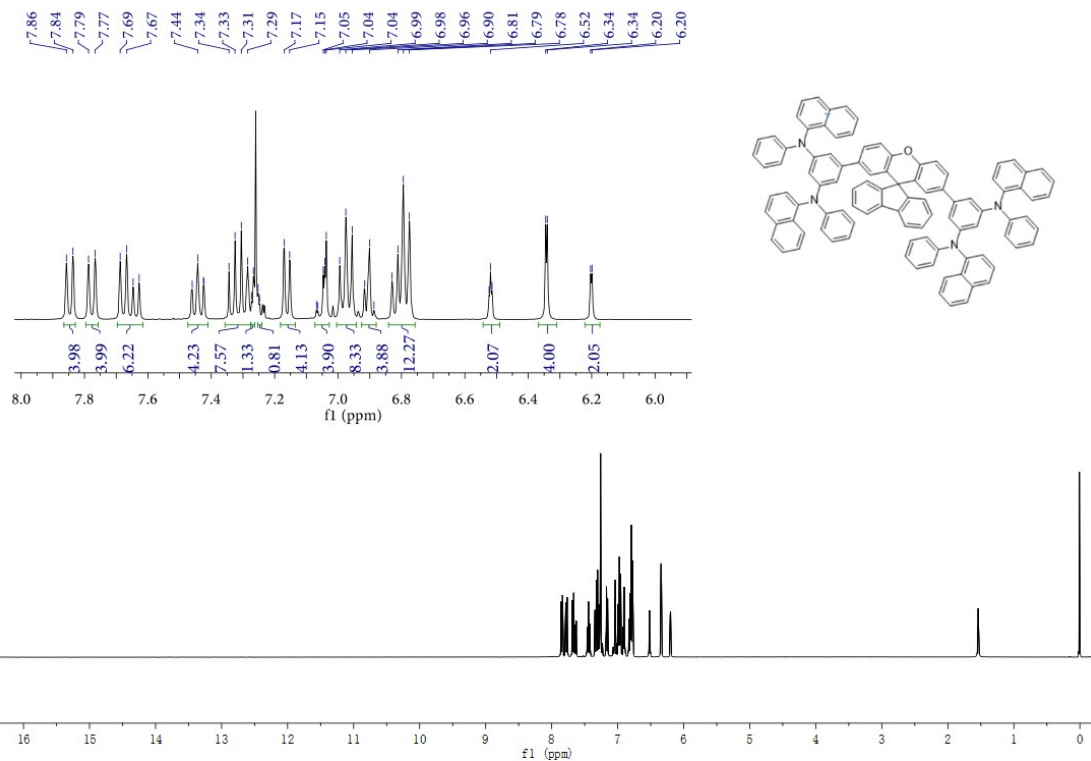

**Fig S2.**  $^1\text{H-NMR}$  spectra of DOPNA-SFX.

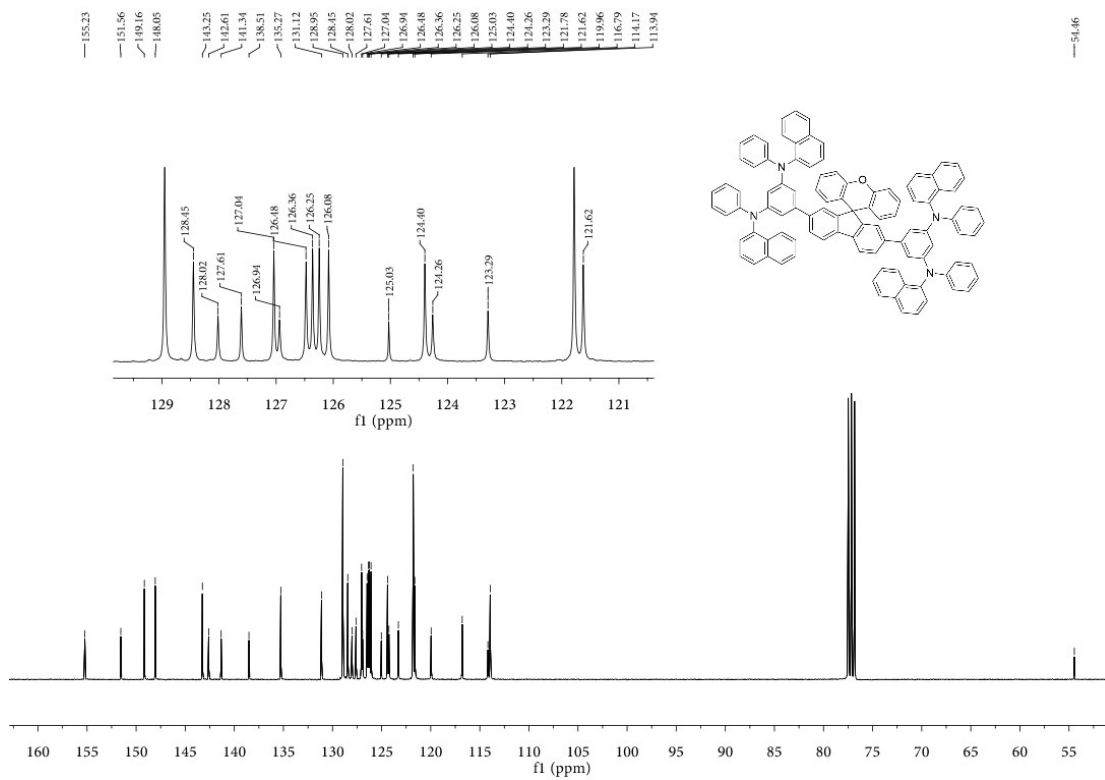

**Fig S3.**  $^{13}\text{C}$ -NMR spectra of DPNA-SFX.

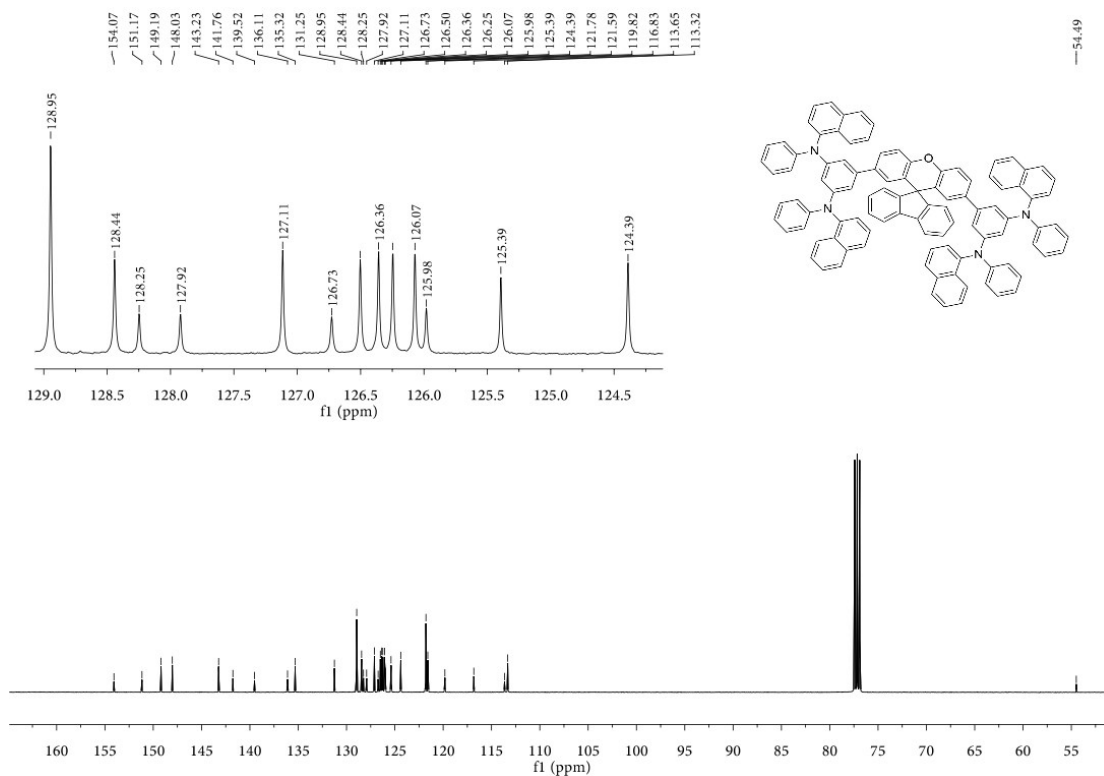

**Fig S4.**  $^{13}\text{C}$ -NMR spectra of DPNA-SFX.

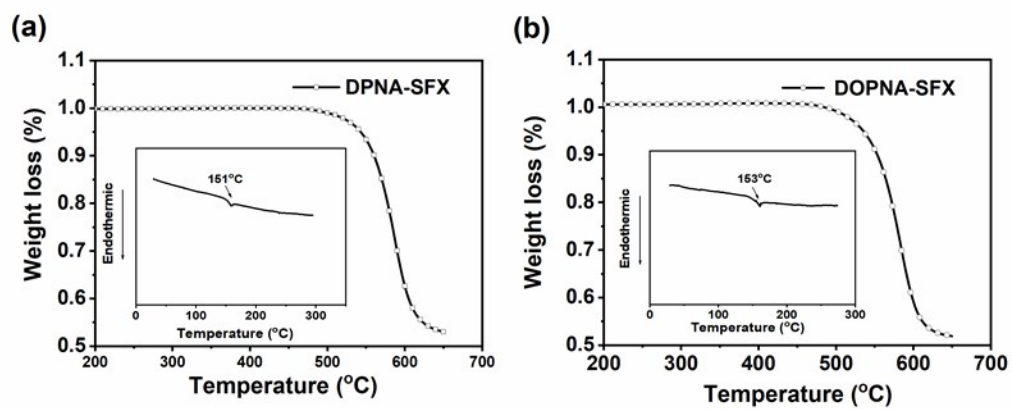

**Fig S5.** TGA and DSC (Inserted pictures) characteristics of (a) DPNA-SFX; (b) DOPNA-SFX.

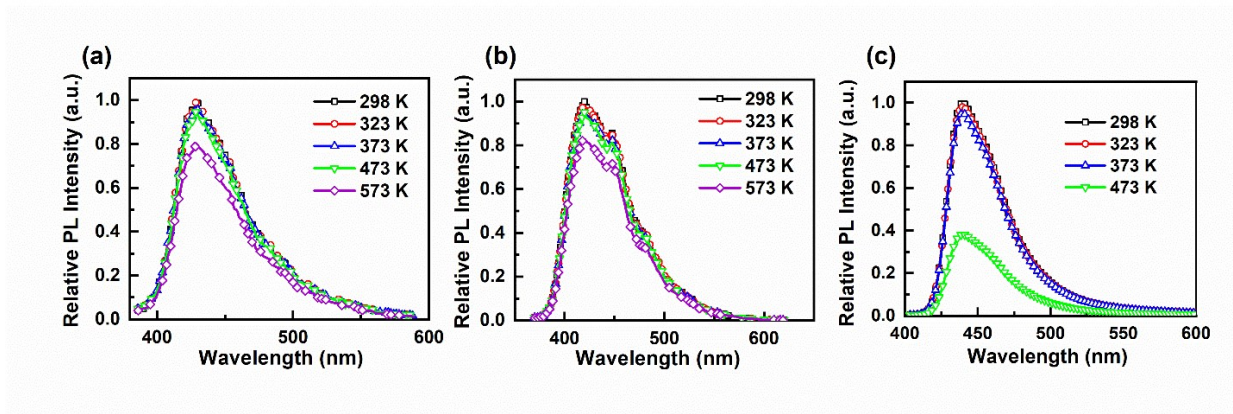

**Fig S6.** PL spectra of (a) DPNA-SFX; (b) DOPNA-SFX; (c) NPB in different temperatures.

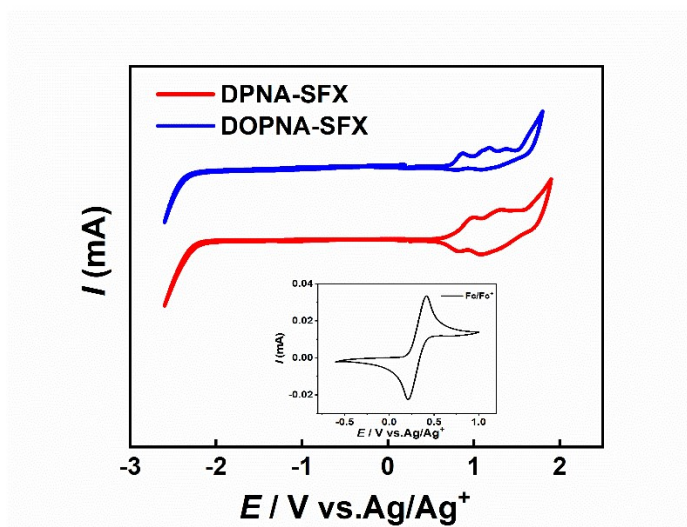

**Fig S7.** Cyclic voltammety curves of DPNA-SFX and DOPNA-SFX.

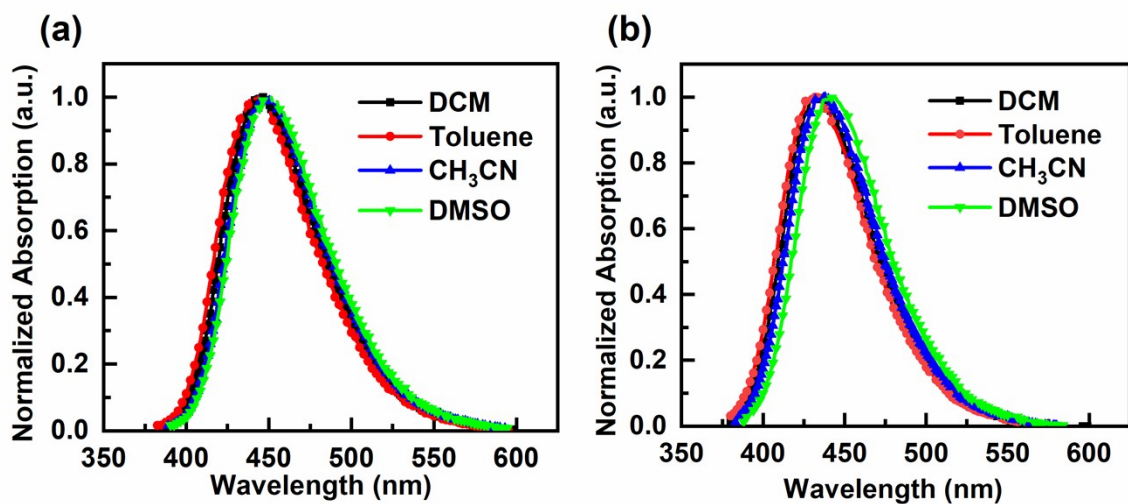

**Figure S8.** Emission spectra of (a) DPNA-SFX and (b) DOPNA-SFX in different solvents.

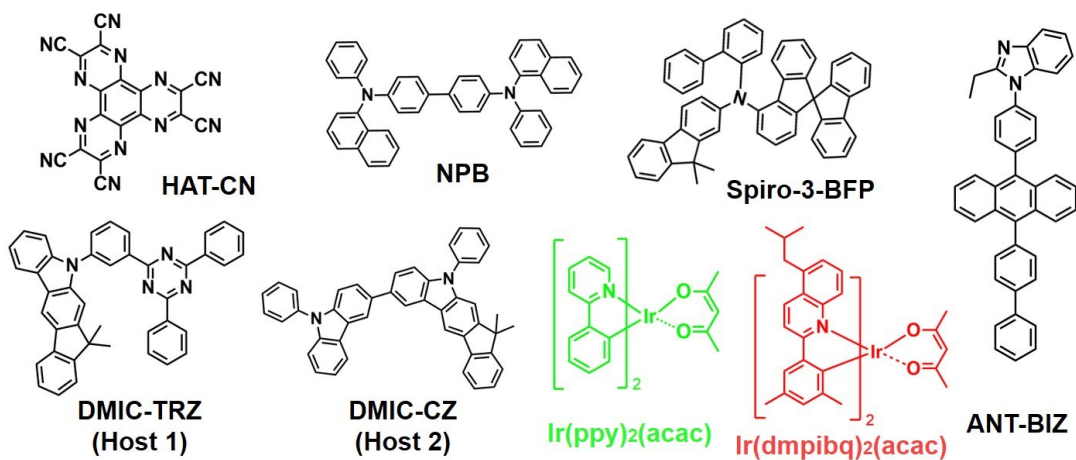

**Fig S9.** Molecules structures of materials used in green and red PHOLEDs.

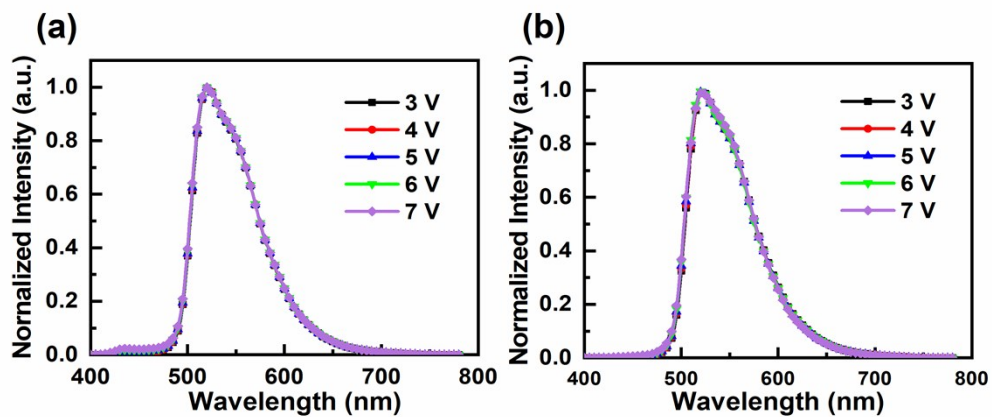

**Fig S10.** EL spectra of (a) DPNA-SFX; (b) DOPNA-SFX based green PHOLEDs under different operational voltage

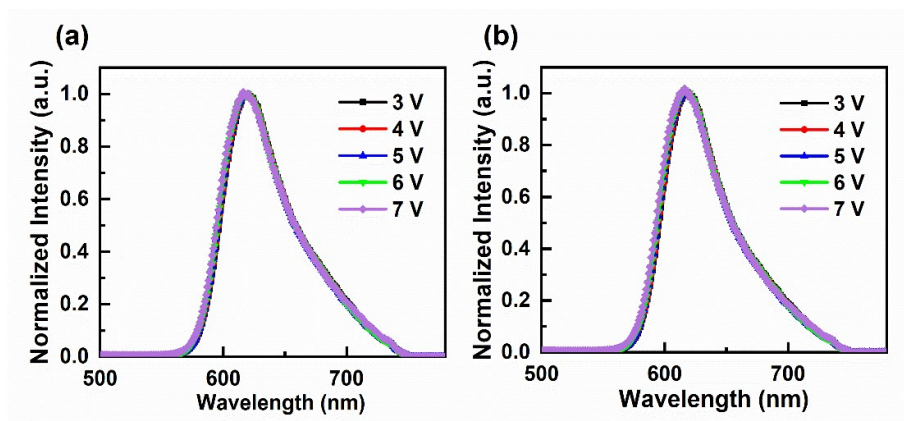

**Fig S11.** EL spectra of (a) DPNA-SFX; (b) DOPNA-SFX based red PHOLEDs under different operational voltage

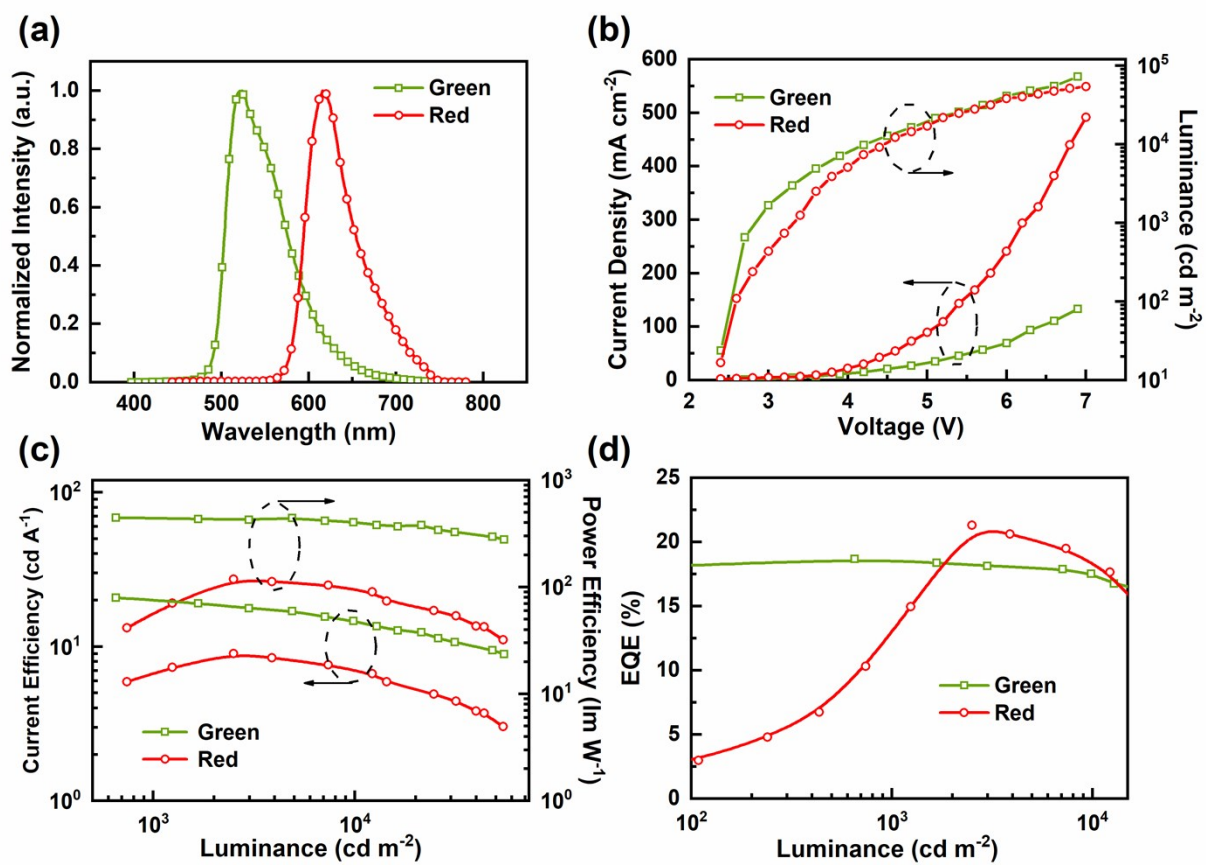

**Fig S12.** Device performances of NPB-based red and green PHOLEDs: (a) EL spectra (4.0 V),

(b) J-V-L curves, (c) CE-L-PE curves, (d) *EQE*-L curves



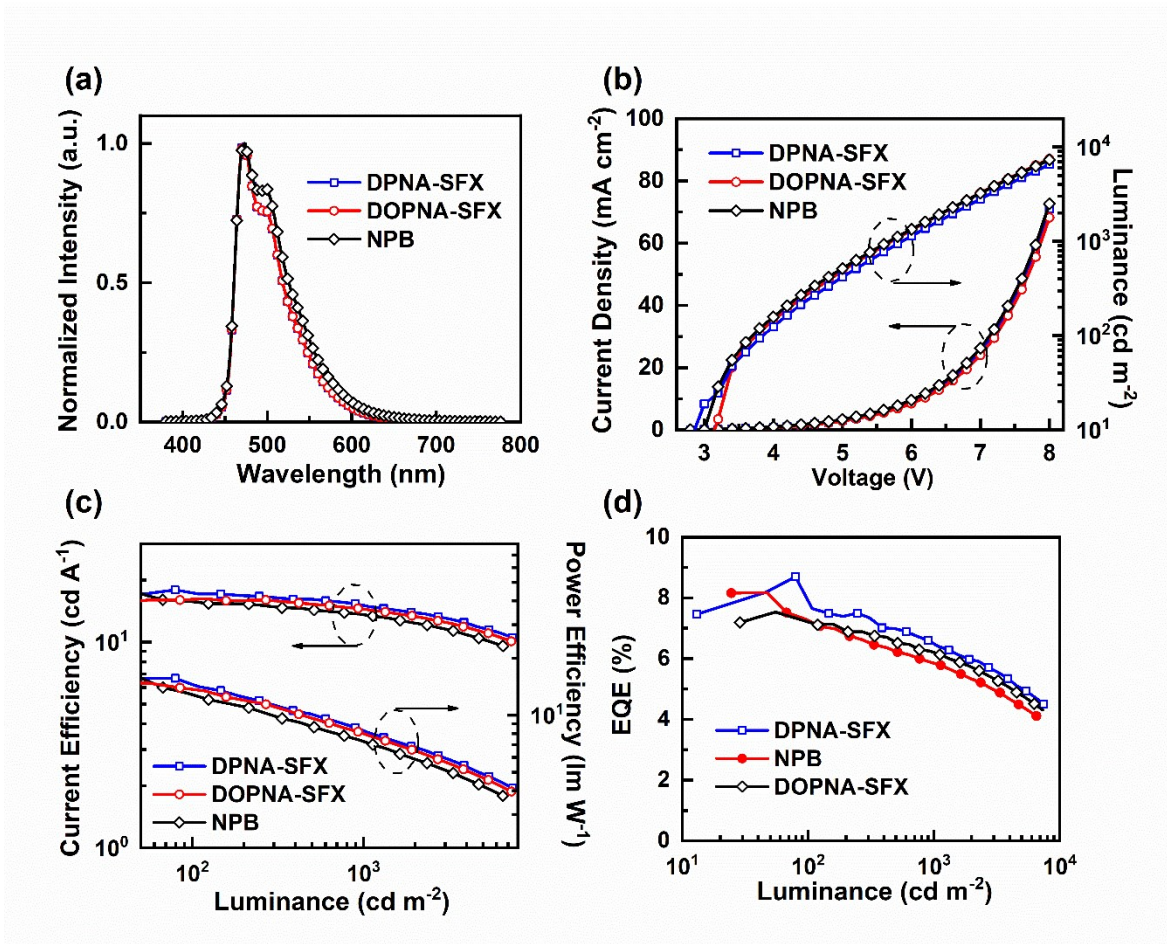

**Fig S13.** Device performances of blue PHOLEDs: (a) EL spectra (4.0 V), (b) J-V-L curves, (c) CE-L-PE curves, (d) EQE-L curves

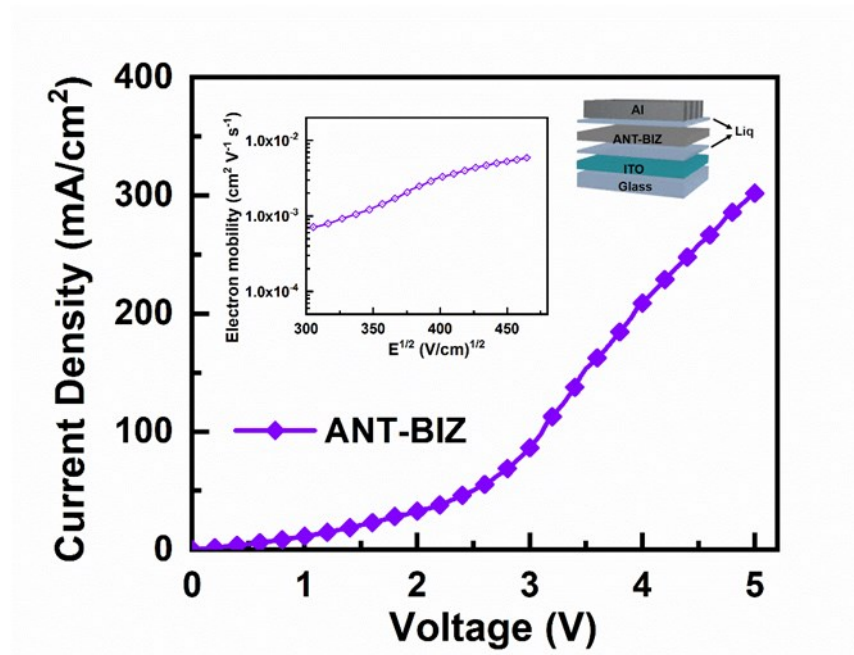

**Fig S14.** J-V curves of the electron-only devices and comparative field dependence mobility of ANT-BIZ (Inserted figure)

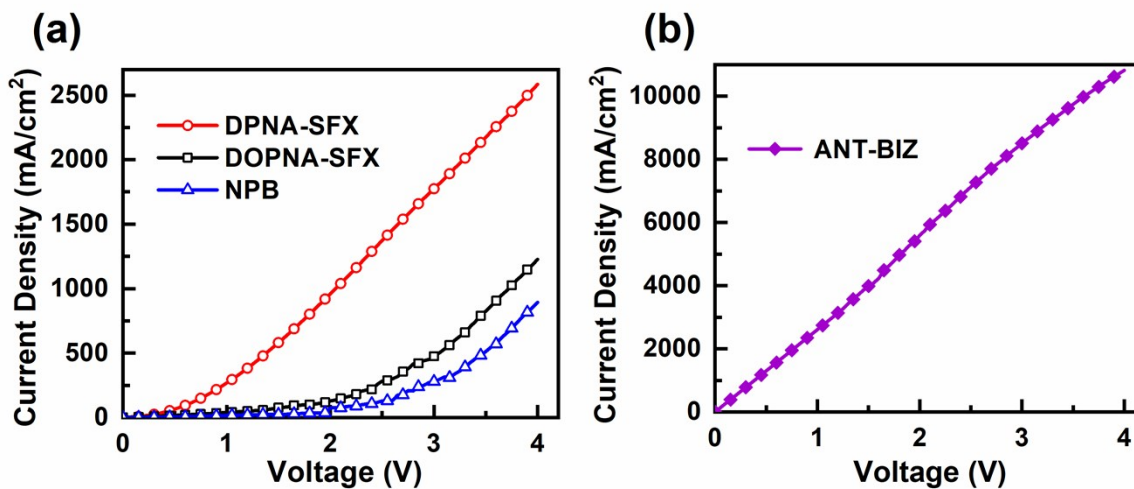

**Fig S15.** J-V curves of the (a) hole-only devices (ITO/HAT-CN (5 nm)/ HTM (30 nm)/ Spiro-3-BFP (10 nm)/Al) (b) electron-only devices (ITO/ANT-BIZ (70 nm)/Liq (2.5 nm)/Al (100 nm))

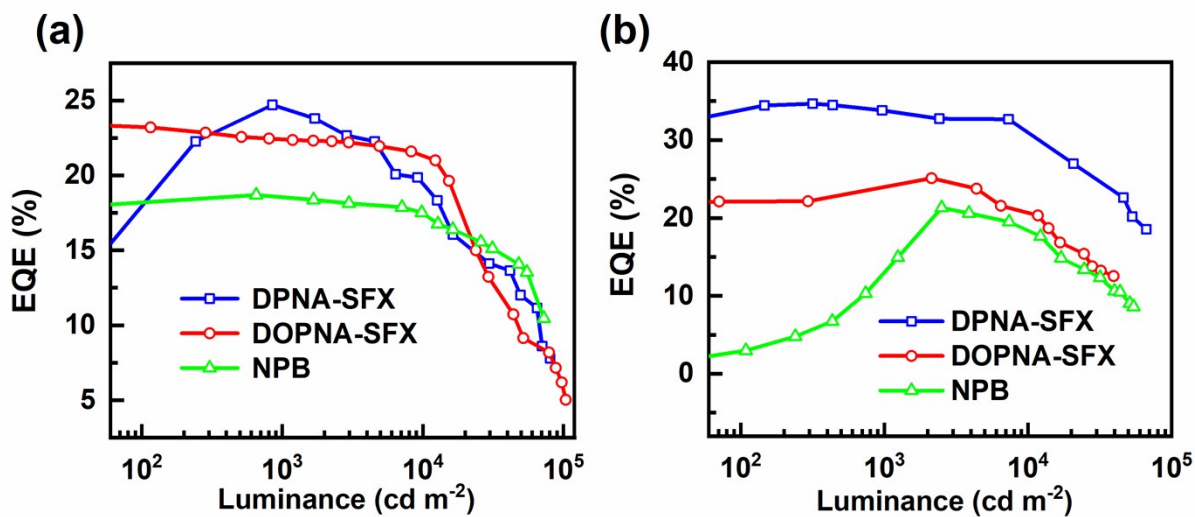

Fig S16. EQE-L curves of (a) Green PHOLED; (b) Red PHOLED up to  $10^5$   $\text{cd m}^{-2}$

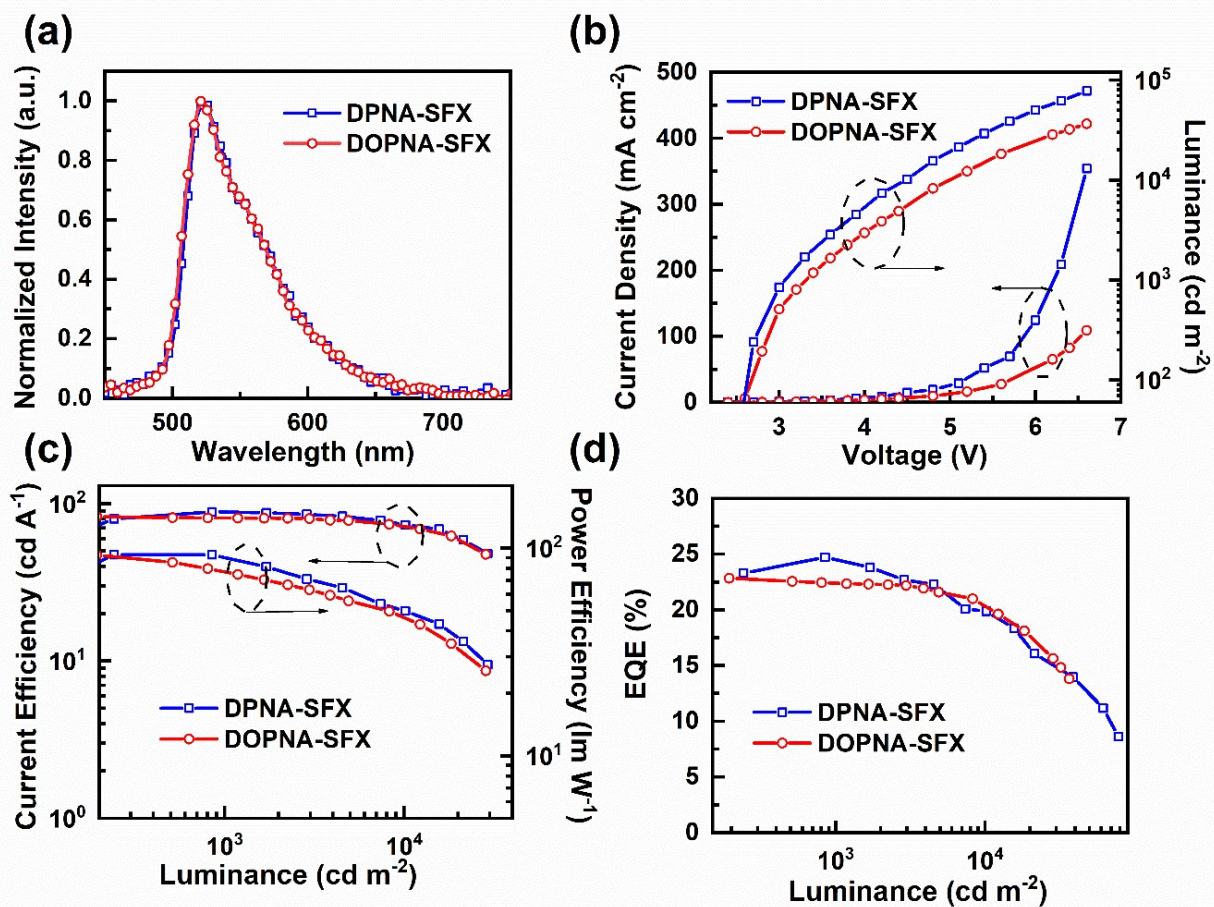

**Fig S17.** Device performances of green PHOLEDs collected in an integrating sphere: (a) EL spectra (4.0 V), (b) J-V-L curves, (c) CE-L-PE curves, (d) EQE-L curves

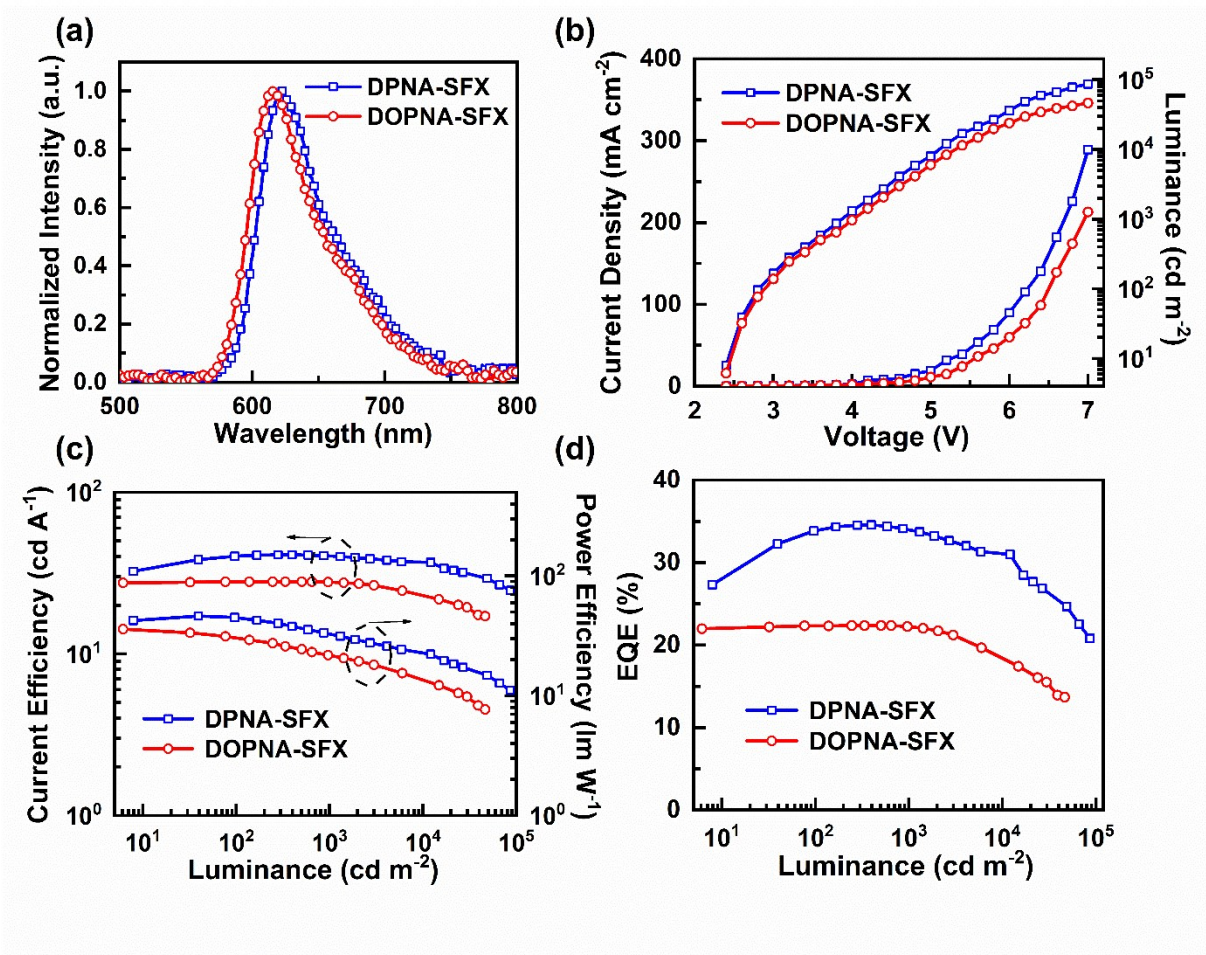

**Fig S18.** Device performances of red PHOLEDs collected in an integrating sphere: (a) EL spectra (4.0 V), (b) J-V-L curves, (c) CE-L-PE curves, (d) EQE-L curves

**Table S1.** Key electroluminescent properties of NPB-based green and red devices

| Devices   | $V_{on}^a$<br>(V) | $CE^c$ (cd A <sup>-1</sup> )                                  |                                                               | $PE^d$ (lm W <sup>-1</sup> )                                  | $EQE^e$ (%)                                                   | CIE <sup>f</sup> |
|-----------|-------------------|---------------------------------------------------------------|---------------------------------------------------------------|---------------------------------------------------------------|---------------------------------------------------------------|------------------|
|           |                   | Max/10 <sup>3</sup> /10 <sup>4</sup><br>(cd m <sup>-2</sup> ) |                  |
| NPB-green | 2.4               | 68.5/67.9/62.1                                                | 79.7/74.6/46.2                                                | 18.7/18.5/17.0                                                | (0.32, 0.62)                                                  |                  |
| NPB-red   | 2.4               | 27.3/19.2/21.5                                                | 23.8/17.7/15.4                                                | 21.3/15.0/12.0                                                | (0.66, 0.34)                                                  |                  |

<sup>a</sup> Turn-on voltage at 1 cd m<sup>-2</sup>. <sup>b</sup> Maximum brightness at 7 V. <sup>c</sup> Current efficiency at maximum values/ at 1000 cd m<sup>-2</sup>/at 10000 cd m<sup>-2</sup> <sup>d</sup> Power efficiency at maximum values/ at 1000 cd m<sup>-2</sup>/at 10000 cd m<sup>-2</sup>. <sup>e</sup> External quantum efficiency at maximum values/ at 1000 cd m<sup>-2</sup>/at 10000 cd m<sup>-2</sup> <sup>f</sup> CIE coordinates at 1000 cd m<sup>-2</sup>

**Table S2.** Key electroluminescent properties of blue devices

| Devices   | $V_{on}^a$<br>(V) | $CE^c$ (cd A <sup>-1</sup> )                 |                                              | $PE^d$ (lm W <sup>-1</sup> )                 | $EQE^e$ (%)                                  | CIE <sup>f</sup> |
|-----------|-------------------|----------------------------------------------|----------------------------------------------|----------------------------------------------|----------------------------------------------|------------------|
|           |                   | Max/10 <sup>3</sup><br>(cd m <sup>-2</sup> ) |                  |
| DPNA-SFX  | 2.8               | 17.93/14.87                                  | 15.63/8.04                                   | 8.70/6.40                                    | (0.17, 0.41)                                 |                  |
| DOPNA-SFX | 2.8               | 17.39/13.67                                  | 16.06/7.40                                   | 8.17/5.88                                    | (0.17, 0.41)                                 |                  |
| NPB       | 2.8               | 16.00/14.58                                  | 14.79/8.18                                   | 7.53/6.25                                    | (0.17, 0.41)                                 |                  |

**Table S3.** Key electroluminescent properties of green and red devices with different thickness of HTL (DPNA-SFX) and ETL (ANT-BIZ)

| Devices | HTL<br>(nm) | ETL<br>(nm) | $CE^a$ (cd A <sup>-1</sup> )                                  |                                                               | $PE^b$ (lm W <sup>-1</sup> )                                  | $EQE^c$ (%)                                                   |
|---------|-------------|-------------|---------------------------------------------------------------|---------------------------------------------------------------|---------------------------------------------------------------|---------------------------------------------------------------|
|         |             |             | Max/10 <sup>3</sup> /10 <sup>4</sup><br>(cd m <sup>-2</sup> ) |
| Green   | 30          | 50          | 55.7/48.1/51.5                                                | 32.4/34.0/24.1                                                | 15.3/13.2/14.2                                                |                                                               |
| Green   | 50          | 50          | 57.4/48.2/-                                                   | 23.8/17.7/-                                                   | 15.8/13.3/-                                                   |                                                               |
| Green   | 50          | 30          | 30.3/26.7/-                                                   | 19.0/10.5/-                                                   | 8.3/7.3/-                                                     |                                                               |
| Red     | 30          | 50          | 22.6/9.1/-                                                    | 29.6/3.6/-                                                    | 19.1/7.7/-                                                    |                                                               |
| Red     | 30          | 30          | 18.6/6.8/-                                                    | 24.4/2.6/-                                                    | 15.7/5.7/-                                                    |                                                               |

<sup>a</sup> Current efficiency at maximum values/ at 1000 cd m<sup>-2</sup>/at 10000 cd m<sup>-2</sup>. <sup>b</sup> Power efficiency at maximum values/ at 1000 cd m<sup>-2</sup>/at 10000 cd m<sup>-2</sup>. <sup>c</sup> External quantum efficiency at maximum values/ at 1000 cd m<sup>-2</sup>/at 10000 cd m<sup>-2</sup>.

<sup>a</sup> Current efficiency at maximum values/ at 1000 cd m<sup>-2</sup>/at 10000 cd m<sup>-2</sup>. <sup>b</sup> Power efficiency at maximum values/ at 1000 cd m<sup>-2</sup>/at 10000 cd m<sup>-2</sup>. <sup>c</sup> External quantum efficiency at maximum values/ at 1000 cd m<sup>-2</sup>/at 10000 cd m<sup>-2</sup>.
